# Supplementary material for: A PON for All Seasons: Comparing Paraoxonase Enzyme Substrates, Activity and Action including the Role of PON3 in Health and Disease
Source: MDPI journal article supplement (doi:10.3390/antiox11030590), 2022-03-19
Supplement: s1 [file s1]

**Supplemental Table S1. Predicted glycosylation patterns and catalytic regions of Paraoxonase isoforms.**

| Residue position | PON1                    |                          | PON2                    |                          | PON3                    |                          |
|------------------|-------------------------|--------------------------|-------------------------|--------------------------|-------------------------|--------------------------|
|                  | Amino Acid Abbreviation | Glycosylation prediction | Amino Acid Abbreviation | Glycosylation prediction | Amino Acid Abbreviation | Glycosylation prediction |
| 1                | M                       | -                        | M                       | -                        | M                       | -                        |
| 2                | A                       | -                        | G                       | -                        | G                       | -                        |
| 3                | K                       | -                        | R                       | -                        | K                       | -                        |
| 4                | L                       | -                        | L                       | -                        | L                       | -                        |
| 5                | I                       | -                        | V                       | -                        | V                       | -                        |
| 6                | A                       | -                        | A                       | -                        | A                       | -                        |
| 7                | L                       | -                        | V                       | -                        | L                       | -                        |
| 8                | T                       | n                        | G                       | -                        | V                       | -                        |
| 9                | L                       | -                        | L                       | -                        | L                       | -                        |
| 10               | L                       | -                        | L                       | -                        | L                       | -                        |
| 11               | G                       | -                        | G                       | -                        | G                       | -                        |
| 12               | M                       | -                        | I                       | -                        | V                       | -                        |
| 13               | G                       | -                        | A                       | -                        | G                       | -                        |
| 14               | L                       | -                        | L                       | -                        | L                       | -                        |
| 15               | A                       | -                        | A                       | -                        | S                       | n                        |
| 16               | L                       | -                        | L                       | -                        | L                       | -                        |
| 17               | F                       | -                        | L                       | -                        | V                       | -                        |
| 18               | R                       | -                        | G                       | -                        | G                       | -                        |
| 19               | N                       | n                        | E                       | -                        | E                       | -                        |
| 20               | H                       | -                        | R                       | -                        | M                       | -                        |
| 21               | Q                       | -                        | L                       | -                        | F                       | -                        |
| 22               | S                       | n                        | L                       | -                        | L                       | -                        |
| 23               | S                       | n                        | A                       | -                        | A                       | -                        |
| 24               | Y                       | -                        | L                       | -                        | F                       | -                        |
| 25               | Q                       | -                        | R                       | -                        | R                       | -                        |
| 26               | T                       | n                        | N                       | n                        | E                       | -                        |
| 27               | R                       | -                        | R                       | -                        | R                       | -                        |
| 28               | L                       | -                        | L                       | -                        | V                       | -                        |
| 29               | N                       | n                        | K                       | -                        | N                       | G (N <sup>1</sup> )      |
| 30               | A                       | -                        | A                       | -                        | A                       | -                        |
| 31               | L                       | -                        | S                       | n                        | S                       | n                        |
| 32               | R                       | -                        | R                       | -                        | R                       | -                        |
| 33               | E                       | -                        | E                       | -                        | E                       | -                        |
| 34               | V                       | -                        | V                       | -                        | V                       | -                        |
| 35               | Q                       | -                        | E                       | -                        | E                       | -                        |
| 36               | P                       | -                        | S                       | n                        | P                       | -                        |

|    |       |   |       |   |       |   |
|----|-------|---|-------|---|-------|---|
| 37 | V     | - | V     | - | V     | - |
| 38 | E     | - | D     | - | E     | - |
| 39 | L     | - | L     | - | P     | - |
| 40 | P     | - | P     | - | E     | - |
| 41 | N     | n | H     | - | N     | n |
| 42 | C     | - | C     | - | C     | - |
| 43 | N     | n | H     | - | H     | - |
| 44 | L     | - | L     | - | L     | - |
| 45 | V     | - | I     | - | I     | - |
| 46 | K     | - | K     | - | E     | - |
| 47 | G     | - | G     | - | E     | - |
| 48 | I     | - | I     | - | L     | - |
| 49 | E     | - | E     | - | E     | - |
| 50 | T     | n | A     | - | S     | n |
| 51 | G     | - | G     | - | G     | - |
| 52 | S     | n | S     | n | S     | n |
| 53 | E*Cat | - | E*Cat | - | E*Cat | - |
| 54 | D*Cat | - | D*Cat | - | D*Cat | - |
| 55 | L     | - | I     | - | I     | - |
| 56 | E     | - | D     | - | D     | - |
| 57 | I     | - | I     | - | I     | - |
| 58 | L     | - | L     | - | L     | - |
| 59 | P     | - | P     | - | P     | - |
| 60 | N     | n | N     | n | S     | n |
| 61 | G     | - | G     | - | G     | - |
| 62 | L     | - | L     | - | L     | - |
| 63 | A     | - | A     | - | A     | - |
| 64 | F     | - | F     | - | F     | - |
| 65 | I     | - | F     | - | I     | - |
| 66 | S     | G | S     | G | S     | G |
| 67 | S     | G | V     | - | S     | G |
| 68 | G     | - | G     | - | G     | - |
| 69 | L     | - | L     | - | L     | - |
| 70 | K     | - | K     | - | K     | - |
| 71 | Y     | - | F     | - | Y     | - |
| 72 | P     | - | P     | - | P     | - |
| 73 | G     | - | G     | - | G     | - |
| 74 | I     | - | L     | - | M     | - |
| 75 | K     | - | H     | - | P     | - |
| 76 | S     | n | S     | n | N     | n |
| 77 | F     | - | F     | - | F     | - |

|     |       |   |       |   |       |   |
|-----|-------|---|-------|---|-------|---|
| 78  | N     | n | A     | - | A     | - |
| 79  | P     | - | P     | - | P     | - |
| 80  | N     | G | D     | - | D     | - |
| 81  | S     | n | K     | - | E     | - |
| 82  | P     | - | P     | - | P     | - |
| 83  | G     | - | G     | - | G     | - |
| 84  | K     | - | G     | - | K     | - |
| 85  | I     | - | I     | - | I     | - |
| 86  | L     | - | L     | - | F     | - |
| 87  | L     | - | M     | - | L     | - |
| 88  | M     | - | M     | - | M     | - |
| 89  | D     | - | D     | - | D     | - |
| 90  | L     | - | L     | - | L     | - |
| 91  | N     | n | K     | - | N     | G |
| 92  | E     | - | E     | - | E     | - |
| 93  | E     | - | E     | - | Q     | - |
| 94  | D     | - | K     | - | N     | n |
| 95  | P     | - | P     | - | P     | - |
| 96  | T     | G | R     | - | R     | - |
| 97  | V     | - | A     | - | A     | - |
| 98  | L     | - | R     | - | Q     | - |
| 99  | E     | - | E     | - | A     | - |
| 100 | L     | - | L     | - | L     | - |
| 101 | G     | - | R     | - | E     | - |
| 102 | I     | - | I     | - | I     | - |
| 103 | T     | n | S     | G | S     | n |
| 104 | G     | - | R     | - | G     | - |
| 105 | S     | G | G     | - | G     | - |
| 106 | K     | - | F     | - | F     | - |
| 107 | F     | - | D     | - | D     | - |
| 108 | D     | - | L     | - | K     | - |
| 109 | V     | - | A     | - | E     | - |
| 110 | S     | n | S     | G | L     | - |
| 111 | S     | G | F     | - | F     | - |
| 112 | F     | - | N     | G | N     | n |
| 113 | N     | G | P     | - | P     | - |
| 114 | P     | - | H     | - | H     | - |
| 115 | H     | - | G     | - | G     | - |
| 116 | G     | - | I*Cat | - | I*Cat | - |
| 117 | I*Cat | - | S     | n | S     | n |
| 118 | S     | G | T     | G | I     | - |

|     |   |   |   |   |   |   |
|-----|---|---|---|---|---|---|
| 119 | T | n | F | - | F | - |
| 120 | F | - | I | - | I | - |
| 121 | T | n | D | - | D | - |
| 122 | D | - | N | G | K | - |
| 123 | E | - | D | - | D | - |
| 124 | D | - | D | - | N | G |
| 125 | N | n | T | G | T | G |
| 126 | A | - | V | - | V | - |
| 127 | M | - | Y | - | Y | - |
| 128 | Y | - | L | - | L | - |
| 129 | L | - | F | - | Y | - |
| 130 | L | - | V | - | V | - |
| 131 | V | - | V | - | V | - |
| 132 | V | - | N | G | N | G |
| 133 | N | G | H | - | H | - |
| 134 | H | - | P | - | P | - |
| 135 | P | - | E | - | H | - |
| 136 | D | - | F | - | M | - |
| 137 | A | - | K | - | K | - |
| 138 | K | - | N | n | S | n |
| 139 | S | n | T | n | T | G |
| 140 | T | n | V | - | V | - |
| 141 | V | - | E | - | E | - |
| 142 | E | - | I | - | I | - |
| 143 | L | - | F | - | F | - |
| 144 | F | - | K | - | K | - |
| 145 | K | - | F | - | F | - |
| 146 | F | - | E | - | E | - |
| 147 | Q | - | E | - | E | - |
| 148 | E | - | A | - | Q | - |
| 149 | E | - | E | - | Q | - |
| 150 | E | - | N | n | R | - |
| 151 | K | - | S | n | S | n |
| 152 | S | n | L | - | L | - |
| 153 | L | - | L | - | V | - |
| 154 | L | - | H | - | Y | - |
| 155 | H | - | L | - | L | - |
| 156 | L | - | K | - | K | - |
| 157 | K | - | T | G | T | G |
| 158 | T | G | V | - | I | - |
| 159 | I | - | K | - | K | - |

|     |       |   |       |   |       |   |
|-----|-------|---|-------|---|-------|---|
| 160 | R     | - | H     | - | H     | - |
| 161 | H     | - | E     | - | E     | - |
| 162 | K     | - | L     | - | L     | - |
| 163 | L     | - | L     | - | L     | - |
| 164 | L     | - | P     | - | K     | - |
| 165 | P     | - | S     | n | S     | n |
| 166 | N     | n | V     | - | V     | - |
| 167 | L     | - | N*Cat | n | N*Cat | n |
| 168 | N*Cat | n | D*Cat | - | D*Cat | - |
| 169 | D*Cat | - | I     | - | I     | - |
| 170 | I     | - | T     | n | V     | - |
| 171 | V     | - | A     | - | V     | - |
| 172 | A     | - | V     | - | L     | - |
| 173 | V     | - | G     | - | G     | - |
| 174 | G     | - | P     | - | P     | - |
| 175 | P     | - | A     | - | E     | - |
| 176 | E     | - | H     | - | Q     | - |
| 177 | H     | - | F     | - | F     | - |
| 178 | F     | - | Y     | - | Y     | - |
| 179 | Y     | - | A     | - | A     | - |
| 180 | G     | - | T     | n | T     | n |
| 181 | T     | n | N     | n | R     | - |
| 182 | N     | n | D     | - | D     | - |
| 183 | D     | - | H     | - | H     | - |
| 184 | H     | - | Y     | - | Y     | - |
| 185 | Y     | - | F     | - | F     | - |
| 186 | F     | - | S     | n | T     | n |
| 187 | L     | - | D     | - | N     | G |
| 188 | D     | - | P     | - | S     | n |
| 189 | P     | - | F     | - | L     | - |
| 190 | Y     | - | L     | - | L     | - |
| 191 | L     | - | K     | - | S     | n |
| 192 | Q     | - | Y     | - | F     | - |
| 193 | S     | n | L     | - | F     | - |
| 194 | W     | - | E     | - | E     | - |
| 195 | E     | - | T     | n | M     | - |
| 196 | M     | - | Y     | - | I     | - |
| 197 | Y     | - | L     | - | L     | - |
| 198 | L     | - | N     | G | D     | - |
| 199 | G     | - | L     | - | L     | - |
| 200 | L     | - | H     | - | R     | - |

|     |       |   |       |   |       |   |
|-----|-------|---|-------|---|-------|---|
| 201 | A     | - | W     | - | W     | - |
| 202 | W     | - | A     | - | T     | G |
| 203 | S     | G | N     | n | Y     | - |
| 204 | Y     | - | V     | - | V     | - |
| 205 | V     | - | V     | - | L     | - |
| 206 | V     | - | Y     | - | F     | - |
| 207 | Y     | - | Y     | - | Y     | - |
| 208 | Y     | - | S     | n | S     | n |
| 209 | S     | n | P     | - | P     | - |
| 210 | P     | - | N     | n | R     | - |
| 211 | S     | n | E     | - | E     | - |
| 212 | E     | - | V     | - | V     | - |
| 213 | V     | - | K     | - | K     | - |
| 214 | R     | - | V     | - | V     | - |
| 215 | V     | - | V     | - | V     | - |
| 216 | V     | - | A     | - | A     | - |
| 217 | A     | - | E     | - | K     | - |
| 218 | E     | - | G     | - | G     | - |
| 219 | G     | - | F     | - | F     | - |
| 220 | F     | - | D     | - | C     | - |
| 221 | D     | - | S     | n | S     | n |
| 222 | F     | - | A     | - | A     | - |
| 223 | A     | - | N*Cat | G | N*Cat | G |
| 224 | N*Cat | G | G     | - | G     | - |
| 225 | G     | - | I     | - | I     | - |
| 226 | I     | - | N     | G | T     | G |
| 227 | N     | G | I     | - | V     | - |
| 228 | I     | - | S     | G | S     | G |
| 229 | S     | n | P     | - | A     | - |
| 230 | P     | - | D     | - | D     | - |
| 231 | D     | - | D     | - | Q     | - |
| 232 | G     | - | K     | - | K     | - |
| 233 | K     | - | Y     | - | Y     | - |
| 234 | Y     | - | I     | - | V     | - |
| 235 | V     | - | Y     | - | Y     | - |
| 236 | Y     | - | V     | - | V     | - |
| 237 | I     | - | A     | - | A     | - |
| 238 | A     | - | D     | - | D     | - |
| 239 | E     | - | I     | - | V     | - |
| 240 | L     | - | L     | - | A     | - |
| 241 | L     | - | A     | - | A     | - |

|     |       |                     |       |                     |       |                     |
|-----|-------|---------------------|-------|---------------------|-------|---------------------|
| 242 | A     | -                   | H     | -                   | K     | -                   |
| 243 | H     | -                   | E     | -                   | N     | n                   |
| 244 | K     | -                   | I     | -                   | I     | -                   |
| 245 | I     | -                   | H     | -                   | H     | -                   |
| 246 | H     | -                   | V     | -                   | I     | -                   |
| 247 | V     | -                   | L     | -                   | M     | -                   |
| 248 | Y     | -                   | E     | -                   | E     | -                   |
| 249 | E     | -                   | K     | -                   | K     | -                   |
| 250 | K     | -                   | H     | -                   | H     | -                   |
| 251 | H     | -                   | T     | n                   | D     | -                   |
| 252 | A     | -                   | N     | G                   | N     | n                   |
| 253 | N     | G (N <sup>1</sup> ) | M     | -                   | W     | -                   |
| 254 | W     | -                   | N     | G                   | D     | -                   |
| 255 | T     | n                   | L     | -                   | L     | -                   |
| 256 | L     | -                   | T     | n                   | T     | n                   |
| 257 | T     | n                   | Q     | -                   | Q     | -                   |
| 258 | P     | -                   | L     | -                   | L     | -                   |
| 259 | L     | -                   | K     | -                   | K     | -                   |
| 260 | K     | -                   | V     | -                   | V     | -                   |
| 261 | S     | n                   | L     | -                   | I     | -                   |
| 262 | L     | -                   | E     | -                   | Q     | -                   |
| 263 | D     | -                   | L     | -                   | L     | -                   |
| 264 | F     | -                   | D     | -                   | G     | -                   |
| 265 | N     | n                   | T     | n                   | T     | G                   |
| 266 | T     | n                   | L     | -                   | L     | -                   |
| 267 | L     | -                   | V     | -                   | V     | -                   |
| 268 | V     | -                   | D*Cat | -                   | D*Cat | -                   |
| 269 | D*Cat | -                   | N*Cat | G (N <sup>1</sup> ) | N*Cat | G (N <sup>1</sup> ) |
| 270 | N*Cat | G (N <sup>1</sup> ) | L     | -                   | L     | -                   |
| 271 | I     | -                   | S     | n                   | T     | G                   |
| 272 | S     | G                   | I     | -                   | V     | -                   |
| 273 | V     | -                   | D     | -                   | D     | -                   |
| 274 | D     | -                   | P     | -                   | P     | -                   |
| 275 | P     | -                   | S     | n                   | A     | -                   |
| 276 | E     | -                   | S     | n                   | T     | G                   |
| 277 | T     | G                   | G     | -                   | G     | -                   |
| 278 | G     | -                   | D     | -                   | D     | -                   |
| 279 | D     | -                   | I     | -                   | I     | -                   |
| 280 | L     | -                   | W     | -                   | L     | -                   |
| 281 | W     | -                   | V     | -                   | A     | -                   |
| 282 | V     | -                   | G     | -                   | G     | -                   |

|     |   |   |   |                     |   |                     |
|-----|---|---|---|---------------------|---|---------------------|
| 283 | G | - | C | -                   | C | -                   |
| 284 | C | - | H | -                   | H | -                   |
| 285 | H | - | P | -                   | P | -                   |
| 286 | P | - | N | n                   | N | n                   |
| 287 | N | n | G | -                   | P | -                   |
| 288 | G | - | Q | -                   | M | -                   |
| 289 | M | - | K | -                   | K | -                   |
| 290 | K | - | L | -                   | L | -                   |
| 291 | I | - | F | -                   | L | -                   |
| 292 | F | - | V | -                   | N | n                   |
| 293 | F | - | Y | -                   | Y | -                   |
| 294 | Y | - | D | -                   | N | n                   |
| 295 | D | - | P | -                   | P | -                   |
| 296 | S | G | N | n                   | E | -                   |
| 297 | E | - | N | n                   | D | -                   |
| 298 | N | n | P | -                   | P | -                   |
| 299 | P | - | P | -                   | P | -                   |
| 300 | P | - | S | G                   | G | -                   |
| 301 | A | - | S | G                   | S | G                   |
| 302 | S | G | E | -                   | E | -                   |
| 303 | E | - | V | -                   | V | -                   |
| 304 | V | - | L | -                   | L | -                   |
| 305 | L | - | R | -                   | R | -                   |
| 306 | R | - | I | -                   | I | -                   |
| 307 | I | - | Q | -                   | Q | -                   |
| 308 | Q | - | N | G                   | N | n                   |
| 309 | N | n | I | -                   | V | -                   |
| 310 | I | - | L | -                   | L | -                   |
| 311 | L | - | S | n                   | S | n                   |
| 312 | T | n | E | -                   | E | -                   |
| 313 | E | - | K | -                   | K | -                   |
| 314 | E | - | P | -                   | P | -                   |
| 315 | P | - | T | G                   | R | -                   |
| 316 | K | - | V | -                   | V | -                   |
| 317 | V | - | T | n                   | S | G                   |
| 318 | T | G | T | G                   | T | G                   |
| 319 | Q | - | V | -                   | V | -                   |
| 320 | V | - | Y | -                   | Y | -                   |
| 321 | Y | - | A | -                   | A | -                   |
| 322 | A | - | N | n                   | N | n                   |
| 323 | E | - | N | G (N <sup>1</sup> ) | N | G (N <sup>1</sup> ) |



|                       |   |                     |    |   |    |   |
|-----------------------|---|---------------------|----|---|----|---|
| 324                   | N | G (N <sup>1</sup> ) | G  | - | G  | - |
| 325                   | G | -                   | S  | n | S  | n |
| 326                   | T | G                   | V  | - | V  | - |
| 327                   | V | -                   | L  | - | L  | - |
| 328                   | L | -                   | Q  | - | Q  | - |
| 329                   | Q | -                   | G  | - | G  | - |
| 330                   | G | -                   | S  | n | T  | G |
| 331                   | S | G                   | S  | G | S  | G |
| 332                   | T | G                   | V  | - | V  | - |
| 333                   | V | -                   | A  | - | A  | - |
| 334                   | A | -                   | S  | n | S  | n |
| 335                   | S | n                   | V  | - | V  | - |
| 336                   | V | -                   | Y  | - | Y  | - |
| 337                   | Y | -                   | D  | - | H  | - |
| 338                   | K | -                   | G  | - | G  | - |
| 339                   | G | -                   | K  | - | K  | - |
| 340                   | K | -                   | L  | - | I  | - |
| 341                   | L | -                   | L  | - | L  | - |
| 342                   | L | -                   | I  | - | I  | - |
| 343                   | I | -                   | G  | - | G  | - |
| 344                   | G | -                   | T  | n | T  | n |
| 345                   | T | n                   | L  | - | V  | - |
| 346                   | V | -                   | Y  | - | F  | - |
| 347                   | F | -                   | H  | - | H  | - |
| 348                   | H | -                   | R  | - | K  | - |
| 349                   | K | -                   | A  | - | T  | n |
| 350                   | A | -                   | L  | - | L  | - |
| 351                   | L | -                   | Y  | - | Y  | - |
| 352                   | Y | -                   | C  | - | C  | - |
| 353                   | C | -                   | E  | - | E  | - |
| 354                   | E | -                   | L  | - | L  | - |
| 355                   | L | -                   |    |   |    |   |
| Glycosylation percent |   | 7%                  | 6% |   | 7% |   |

Predicted glycosylation patterns of PON1 (PMID Accession no. P27169 ), PON2 (PMID Accession no. Q15165), and PON3 (PMID Accession no. Q15166) through computational modeling and analysis obtained from (<https://comp.chem.nottingham.ac.uk/cgi-bin/glyco/bin/getparams.cgi>); \*<sub>Cat</sub> Denotes Amino acid residue in catalytic region; G = Predicted glycosylated residue; n = Residue is not predicted to be glycosylated; - = Other residue; N<sup>1</sup>=published N-linked glycosylation residue
